# Supplementary material
Source: PubMed Central journal article supplement (PMC3127178)
Supplement: mmc1.pdf [file mmc1.pdf]

# **How Do Thermophilic Proteins and Proteomes Withstand High Temperature?**

Lucas Sawle and Kingshuk Ghosh

Department of Physics and Astronomy, University of Denver, Denver, Colorado

## **Supporting Material**

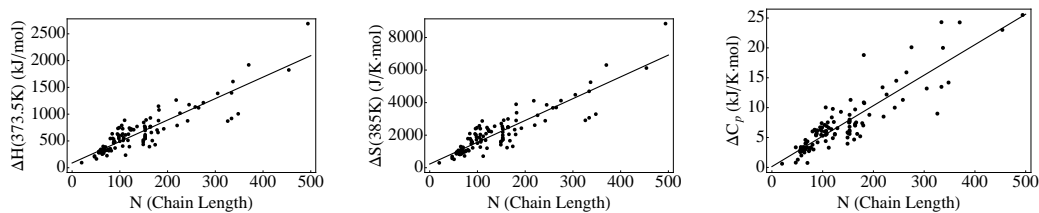

Figure 1: Change in enthalpy, entropy and specific heat upon unfolding for 116 different proteins. Solid lines show the best linear fit and filled circles show data. Table 1 in this supplemental material lists all these proteins. Based on the regression analysis we find  $\Delta H(373.5) = (4.0N + 88)$  kJ/mol,  $\Delta S(385) = (13.39N + 226)$  J/K-mol and  $\Delta C_p = 0.051N + 0.14$  kJ/K-mol.

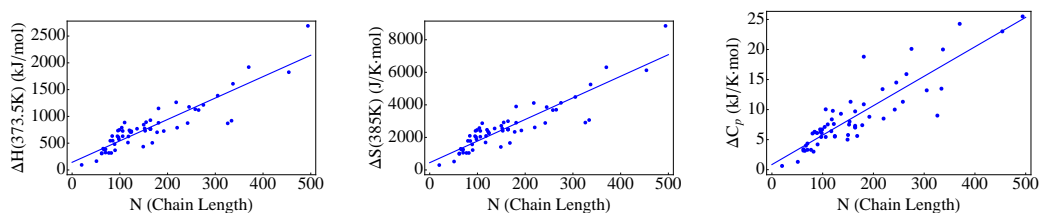

Figure 2: Change in enthalpy, entropy and specific heat upon unfolding for mesophiles is linearly dependent on the chain length  $N$  of the protein.

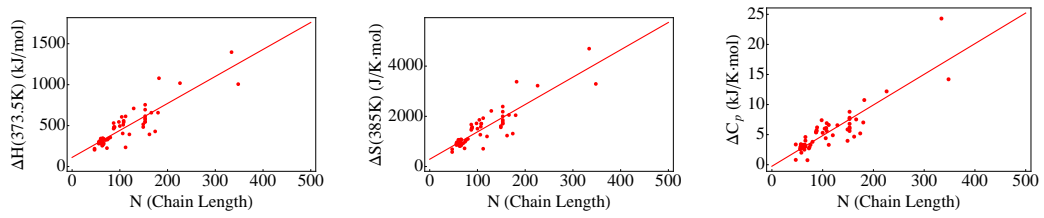

Figure 3: Change in enthalpy, entropy and specific heat upon unfolding for thermophiles is linearly dependent on the chain length  $N$  of the protein.

Table 1: Thermodynamic Parameters of the proteins

| Protein                           | PDB  | N <sub>res</sub> | $\Delta H(T_m)$<br>( $\frac{\text{kJ}}{\text{mol}}$ ) | $\Delta S(T_m)$<br>( $\frac{\text{J}}{\text{mol K}}$ ) | $\Delta C_p$<br>( $\frac{\text{kJ}}{\text{mol K}}$ ) | $T_m$<br>(K) | $\Delta H(373.5)$<br>( $\frac{\text{kJ}}{\text{mol}}$ ) | $\Delta S(385)$<br>( $\frac{\text{J}}{\text{mol K}}$ ) |
|-----------------------------------|------|------------------|-------------------------------------------------------|--------------------------------------------------------|------------------------------------------------------|--------------|---------------------------------------------------------|--------------------------------------------------------|
| S16 (Thermo) (1)                  | 3BN0 | 112              | 270.0                                                 | 702.6                                                  | 3.3                                                  | 384.3        | 234.4                                                   | 708.6                                                  |
| BPTI (2)                          | 5PTI | 58               | 317.0                                                 | 840.8                                                  | 2.0                                                  | 377          | 310.0                                                   | 883.0                                                  |
| CheY (Thermo) (3)                 | 1TMY | 120              | 395.3                                                 | 1056.9                                                 | 4.9                                                  | 374          | 392.8                                                   | 1198.8                                                 |
| Sso7 (4)                          | 1SSO | 62               | 274.0                                                 | 736.6                                                  | 2.7                                                  | 372          | 278.1                                                   | 829.3                                                  |
| T4 lysozyme (K5I/K39V mutant) (5) |      | 47               | 213.4                                                 | 573.6                                                  | 3.4                                                  | 372          | 218.4                                                   | 689.2                                                  |
| MGMT (6)                          | 1MG1 | 174              | 419.0                                                 | 1127.6                                                 | 5.2                                                  | 371.6        | 428.9                                                   | 1311.8                                                 |
| Albumin (K5I Mutant) (7)          | 1PRB | 47               | 200.8                                                 | 544.3                                                  | 0.8                                                  | 369          | 204.4                                                   | 578.0                                                  |
| Cold Shock Tm (4)                 | 1G6P | 66               | 259.0                                                 | 705.7                                                  | 4.6                                                  | 367          | 288.9                                                   | 926.0                                                  |
| Ribosomal L30E (8)                | 1H7M | 100              | 459.0                                                 | 1251.4                                                 | 5.3                                                  | 366.8        | 494.5                                                   | 1508.0                                                 |
| Tendamistat (2)                   | 3AIT | 74               | 307.0                                                 | 838.8                                                  | 2.9                                                  | 366          | 328.8                                                   | 985.6                                                  |
| Stefin A (2)                      | 1CYV | 98               | 473.0                                                 | 1300.2                                                 | 7.4                                                  | 363.8        | 544.8                                                   | 1719.3                                                 |
| Sac7d (4)                         | 1AZQ | 66               | 245.0                                                 | 673.6                                                  | 3.0                                                  | 363.7        | 274.4                                                   | 844.4                                                  |
| TRP Repressor (2)                 | 2OZ9 | 107              | 448.0                                                 | 1233.1                                                 | 6.1                                                  | 363.3        | 510.2                                                   | 1587.0                                                 |
| Parvalbumin (2)                   | 5CPV | 108              | 500.0                                                 | 1377.4                                                 | 5.6                                                  | 363          | 558.8                                                   | 1706.9                                                 |
| Ubiquitin (2)                     | 1UBQ | 76               | 308.0                                                 | 848.5                                                  | 3.3                                                  | 363          | 342.7                                                   | 1042.7                                                 |
| HistidineBSt (9)                  |      | 88               | 414.2                                                 | 1146.4                                                 | 5.7                                                  | 361.3        | 484.1                                                   | 1510.5                                                 |
| ONC (10)                          | 1ONC | 104              | 530.0                                                 | 1469.0                                                 | 6.0                                                  | 360.8        | 606.2                                                   | 1858.5                                                 |
| HT c552 (11)                      | 1AYG | 80               | 305.9                                                 | 848.5                                                  | 3.8                                                  | 360.5        | 355.3                                                   | 1098.4                                                 |
| B1 of Protein G (2)               | 1PGB | 56               | 258.0                                                 | 715.7                                                  | 2.6                                                  | 360.5        | 291.8                                                   | 886.0                                                  |
| Thioredoxin (2)                   | 2TRX | 108              | 447.3                                                 | 1242.5                                                 | 6.9                                                  | 360          | 540.5                                                   | 1705.8                                                 |
| $\beta$ -Lactoglobulin (12)       |      | 162              | 325.9                                                 | 907.5                                                  | 4.7                                                  | 359.1        | 393.1                                                   | 1232.4                                                 |
| RNaseH (Thermo) (4)               | 1RIL | 166              | 548.1                                                 | 1526.7                                                 | 7.5                                                  | 359          | 657.3                                                   | 2053.2                                                 |
| Eglin C (13)                      | 2TEC | 70               | 312.7                                                 | 871.5                                                  | 0.8                                                  | 358.8        | 323.7                                                   | 924.4                                                  |
| OMTKY3 (2)                        | 2OVO | 56               | 240.0                                                 | 670.0                                                  | 2.6                                                  | 358.2        | 279.8                                                   | 857.6                                                  |

| Protein                            | PDB  | N <sub>res</sub> | $\Delta H(T_m)$<br>( $\frac{\text{kJ}}{\text{mol}}$ ) | $\Delta S(T_m)$<br>( $\frac{\text{J}}{\text{mol K}}$ ) | $\Delta C_p$<br>( $\frac{\text{kJ}}{\text{mol K}}$ ) | T <sub>m</sub><br>(K) | $\Delta H(373.5)$<br>( $\frac{\text{kJ}}{\text{mol}}$ ) | $\Delta S(385)$<br>( $\frac{\text{J}}{\text{mol K}}$ ) |
|------------------------------------|------|------------------|-------------------------------------------------------|--------------------------------------------------------|------------------------------------------------------|-----------------------|---------------------------------------------------------|--------------------------------------------------------|
| SPCI (14)                          |      | 180              | 548.1                                                 | 1531.4                                                 | 7.0                                                  | 357.9                 | 657.6                                                   | 2043.9                                                 |
| Metmyoglobin (rat) (15)            |      | 153              | 473.0                                                 | 1324.9                                                 | 6.2                                                  | 357                   | 575.3                                                   | 1793.1                                                 |
| Metmyoglobin (raccoon) (15)        |      | 153              | 465.0                                                 | 1308.8                                                 | 6.8                                                  | 355.3                 | 588.8                                                   | 1854.7                                                 |
| Histidine Bh (9)                   |      | 87               | 364.0                                                 | 1024.5                                                 | 5.4                                                  | 355.3                 | 463.0                                                   | 1461.2                                                 |
| Subtilisin Inhibitor (2)           | 3SSI | 226              | 795.5                                                 | 2239.4                                                 | 12.2                                                 | 355.21                | 1018.4                                                  | 3221.1                                                 |
| Metmyoglobin (horse) (15)          | 1YMB | 153              | 548.0                                                 | 1545.0                                                 | 7.8                                                  | 354.7                 | 694.6                                                   | 2184.3                                                 |
| Alkaline Proteinase Inhibitor (16) | 1JIW | 106              | 320.5                                                 | 904.1                                                  | 4.4                                                  | 354.5                 | 404.2                                                   | 1267.7                                                 |
| Metmyoglobin (opossum) (15)        | 1MBO | 153              | 435.0                                                 | 1230.6                                                 | 5.6                                                  | 353.5                 | 547.0                                                   | 1708.6                                                 |
| Myoglobin (whale) (2)              | 1MBO | 153              | 575.0                                                 | 1628.4                                                 | 8.8                                                  | 353.1                 | 754.5                                                   | 2389.6                                                 |
| Btk (4)                            | 1AWX | 64               | 196.0                                                 | 555.2                                                  | 3.1                                                  | 353                   | 259.6                                                   | 824.2                                                  |
| Iso2 Cytochrome (17)               | 1YEA | 112              | 473.2                                                 | 1342.8                                                 | 6.6                                                  | 352.4                 | 612.7                                                   | 1927.6                                                 |
| B2 of Protein G (2)                | 1PGX | 56               | 238.0                                                 | 675.4                                                  | 2.9                                                  | 352.4                 | 299.2                                                   | 931.6                                                  |
| Metmyoglobin (armadillo) (15)      | 1YMB | 153              | 417.0                                                 | 1184.7                                                 | 6.0                                                  | 352                   | 546.0                                                   | 1722.3                                                 |
| Sem5 (18)                          | 1KFZ | 60               | 271.0                                                 | 769.9                                                  | 3.3                                                  | 352                   | 342.0                                                   | 1065.6                                                 |
| SRBP (19)                          | 1RBP | 182              | 836.8                                                 | 2384.0                                                 | 10.8                                                 | 351                   | 1078.7                                                  | 3378.0                                                 |
| Cold Shock Bc (20)                 | 1C9O | 66               | 245.0                                                 | 700.2                                                  | 4.0                                                  | 349.9                 | 339.4                                                   | 1082.6                                                 |
| Lysozyme (chicken) (21)            | 1HEL | 129              | 550.3                                                 | 1575.7                                                 | 6.6                                                  | 349.2                 | 709.7                                                   | 2216.0                                                 |
| Histidine St (9)                   | 1Y4Y | 87               | 397.5                                                 | 1140.3                                                 | 5.4                                                  | 348.6                 | 531.0                                                   | 1672.6                                                 |
| Bergerac D48G mutant (22)          | 1BK2 | 57               | 225.0                                                 | 648.0                                                  | 3.1                                                  | 347.2                 | 306.7                                                   | 969.2                                                  |
| Rhodopsin (bovine) (23)            | 1U19 | 348              | 630.0                                                 | 1815.6                                                 | 14.2                                                 | 347                   | 1006.3                                                  | 3291.2                                                 |
| Phycocyanin (Thermo) (24)          |      | 334              | 753.0                                                 | 2170.0                                                 | 24.3                                                 | 347                   | 1396.9                                                  | 4695.2                                                 |
| CI2 (2)                            | 1COA | 64               | 280.0                                                 | 807.4                                                  | 2.5                                                  | 346.8                 | 346.8                                                   | 1069.2                                                 |
| Alpha 3D (25)                      | 2A3D | 73               | 150.6                                                 | 435.1                                                  | 2.7                                                  | 346.2                 | 224.9                                                   | 724.0                                                  |
| HistidineBS (9)                    | 1SPH | 88               | 322.2                                                 | 931.2                                                  | 5.6                                                  | 346                   | 475.1                                                   | 1525.0                                                 |
| Bergerac SHH mutant (22)           | 2OAW | 65               | 230.6                                                 | 667.8                                                  | 3.3                                                  | 345.3                 | 323.4                                                   | 1026.1                                                 |
| Tec (4)                            | 1GL5 | 63               | 169.0                                                 | 491.3                                                  | 2.9                                                  | 344                   | 254.6                                                   | 817.8                                                  |

| Protein                                | PDB  | N <sub>res</sub> | $\Delta H(T_m)$<br>( $\frac{\text{kJ}}{\text{mol}}$ ) | $\Delta S(T_m)$<br>( $\frac{\text{J}}{\text{mol K}}$ ) | $\Delta C_p$<br>( $\frac{\text{kJ}}{\text{mol K}}$ ) | T <sub>m</sub><br>(K) | $\Delta H(373.5)$<br>( $\frac{\text{kJ}}{\text{mol}}$ ) | $\Delta S(385)$<br>( $\frac{\text{J}}{\text{mol K}}$ ) |
|----------------------------------------|------|------------------|-------------------------------------------------------|--------------------------------------------------------|------------------------------------------------------|-----------------------|---------------------------------------------------------|--------------------------------------------------------|
| Fyn (4)                                | 1SHF | 64               | 233.0                                                 | 678.1                                                  | 3.3                                                  | 343.6                 | 331.7                                                   | 1053.5                                                 |
| Barstar (2)                            | 1BTA | 89               | 292.0                                                 | 851.6                                                  | 6.2                                                  | 342.9                 | 481.7                                                   | 1569.5                                                 |
| glutamate dehydrogenase domain II (26) | 1B26 | 149              | 301.2                                                 | 879.3                                                  | 5.9                                                  | 342.6                 | 482.2                                                   | 1562.8                                                 |
| Odorant Binding Protein (27)           | 1A3Y | 149              | 391.2                                                 | 1143.2                                                 | 4.0                                                  | 342.2                 | 515.5                                                   | 1611.0                                                 |
| Irk (4)                                | 2RNA | 57               | 178.0                                                 | 520.5                                                  | 3.4                                                  | 342                   | 285.1                                                   | 923.1                                                  |
| Abl (4)                                | 1BBZ | 63               | 194.0                                                 | 568.1                                                  | 3.3                                                  | 341.5                 | 299.6                                                   | 963.7                                                  |
| Metmyoglobin (carp) (15)               |      | 153              | 370.0                                                 | 1084.1                                                 | 7.6                                                  | 341.3                 | 614.7                                                   | 1999.7                                                 |
| NPS (28)                               |      | 89               | 282.0                                                 | 827.5                                                  | 6.1                                                  | 340.8                 | 481.5                                                   | 1571.3                                                 |
| cytochrome b562 (29)                   | 1QPU | 106              | 393.3                                                 | 1156.1                                                 | 10.0                                                 | 340.2                 | 727.7                                                   | 2398.3                                                 |
| ESBL (30)                              | 4BLM | 265              | 585.8                                                 | 1722.9                                                 | 15.9                                                 | 340                   | 1118.5                                                  | 3699.3                                                 |
| Transferrin (Apo)                      | 1BTJ | 337              | 927.0                                                 | 2731.3                                                 | 20.0                                                 | 339.4                 | 1609.0                                                  | 5252.6                                                 |
| Bergerac SHA mutant (22)               |      | 70               | 237.5                                                 | 700.4                                                  | 4.3                                                  | 339.1                 | 386.9                                                   | 1251.9                                                 |
| RNaseH (Meso) (4)                      | 2RN2 | 155              | 502.1                                                 | 1481.1                                                 | 11.3                                                 | 339                   | 892.0                                                   | 2919.0                                                 |
| Bergerac-SH3 (22)                      | 1SHG | 62               | 197.0                                                 | 581.1                                                  | 3.2                                                  | 339                   | 306.8                                                   | 985.9                                                  |
| $\alpha$ -Spectrin (4)                 | 1SHG | 62               | 197.0                                                 | 581.1                                                  | 3.4                                                  | 339                   | 314.3                                                   | 1013.7                                                 |
| Lac Repressor Headpiece (2)            | 1LCD | 51               | 118.0                                                 | 349.1                                                  | 1.3                                                  | 338                   | 164.2                                                   | 518.3                                                  |
| PsbQ (31)                              |      | 149              | 256.5                                                 | 759.3                                                  | 5.0                                                  | 337.8                 | 435.0                                                   | 1413.2                                                 |
| T4 Lysozyme (Pseudo WT) (5)            | 1L63 | 164              | 581.0                                                 | 1721.0                                                 | 9.7                                                  | 337.6                 | 929.2                                                   | 2995.4                                                 |
| Rnase B (32)                           | 1RBB | 124              | 520.0                                                 | 1542.1                                                 | 5.6                                                  | 337.2                 | 723.3                                                   | 2284.5                                                 |
| Histidine Ec (33)                      | 1POH | 85               | 317.1                                                 | 942.1                                                  | 6.2                                                  | 336.6                 | 547.0                                                   | 1779.1                                                 |
| maltose binding protein (34)           | 1OMP | 370              | 1010.0                                                | 3006.0                                                 | 24.3                                                 | 336                   | 1920.0                                                  | 6309.6                                                 |
| Phycocyanin (Meso) (24)                |      | 334              | 414.0                                                 | 1232.1                                                 | 13.5                                                 | 336                   | 919.5                                                   | 3067.0                                                 |
| Rnase A (4)                            | 5RSA | 124              | 500.0                                                 | 1489.0                                                 | 5.5                                                  | 335.8                 | 707.4                                                   | 2241.0                                                 |
| $\alpha$ -Chymotrypsinogen (2)         | 2CGA | 245              | 619.0                                                 | 1847.8                                                 | 14.5                                                 | 335                   | 1177.3                                                  | 3864.1                                                 |
| Arabinose Binding Protein (2)          | 1ABE | 305              | 840.0                                                 | 2530.1                                                 | 13.2                                                 | 332                   | 1387.8                                                  | 4483.0                                                 |
| Endoglucanase 3 (35)                   | 1H8V | 218              | 707.1                                                 | 2129.8                                                 | 13.4                                                 | 332                   | 1263.2                                                  | 4114.5                                                 |

| Protein                                    | PDB  | N <sub>res</sub> | $\Delta H(T_m)$<br>( $\frac{\text{kJ}}{\text{mol}}$ ) | $\Delta S(T_m)$<br>( $\frac{\text{J}}{\text{mol K}}$ ) | $\Delta C_p$<br>( $\frac{\text{kJ}}{\text{mol K}}$ ) | T <sub>m</sub><br>(K) | $\Delta H(373.5)$<br>( $\frac{\text{kJ}}{\text{mol}}$ ) | $\Delta S(385)$<br>( $\frac{\text{J}}{\text{mol K}}$ ) |
|--------------------------------------------|------|------------------|-------------------------------------------------------|--------------------------------------------------------|------------------------------------------------------|-----------------------|---------------------------------------------------------|--------------------------------------------------------|
| Kunitz type soybean trypsin inhibitor (29) | 1AVU | 181              | 428.9                                                 | 1291.7                                                 | 10.9                                                 | 332                   | 880.3                                                   | 2902.9                                                 |
| EIN (36)                                   |      | 258              | 665.3                                                 | 2003.9                                                 | 11.3                                                 | 332                   | 1134.3                                                  | 3677.5                                                 |
| S16 (Meso) (1)                             |      | 117              | 244.0                                                 | 735.6                                                  | 6.4                                                  | 331.7                 | 511.5                                                   | 1689.3                                                 |
| Subtilisin BPN (2)                         | 2ST1 | 275              | 370.0                                                 | 1116.1                                                 | 20.1                                                 | 331.5                 | 1214.2                                                  | 4123.4                                                 |
| Orosomucoid (37)                           |      | 181              | 350.0                                                 | 1057.4                                                 | 18.8                                                 | 331                   | 1149.0                                                  | 3898.6                                                 |
| flavodoxin (29)                            | 1FTG | 168              | 264.0                                                 | 799.3                                                  | 5.6                                                  | 330.3                 | 506.2                                                   | 1658.5                                                 |
| Lamba-Repressor 6-85 (29)                  | 1LMB | 80               | 284.5                                                 | 861.6                                                  | 6.0                                                  | 330.2                 | 545.4                                                   | 1786.7                                                 |
| Cold Shock A (4)                           | 1MJC | 70               | 181.0                                                 | 548.5                                                  | 3.3                                                  | 330                   | 324.6                                                   | 1057.2                                                 |
| TRP-engineered (38)                        | 1L2Y | 20               | 67.4                                                  | 204.2                                                  | 0.6                                                  | 329.9                 | 94.4                                                    | 299.8                                                  |
| CheY (Meso) (3)                            | 3CHY | 120              | 294.8                                                 | 898.9                                                  | 9.8                                                  | 328                   | 740.3                                                   | 2467.7                                                 |
| T4 lysozyme (K48[A]) (5)                   |      | 164              | 430.0                                                 | 1312.6                                                 | 7.3                                                  | 327.6                 | 765.1                                                   | 2491.2                                                 |
| T4 lysozyme (A42K) (5)                     |      | 164              | 440.0                                                 | 1343.9                                                 | 7.0                                                  | 327.4                 | 762.7                                                   | 2478.3                                                 |
| T4 lysozyme (S44[A]) (5)                   | 1L63 | 164              | 442.0                                                 | 1350.4                                                 | 7.1                                                  | 327.3                 | 770.0                                                   | 2503.2                                                 |
| ApoLipoprotein A1 (39)                     | 2A01 | 242              | 410.0                                                 | 1253.8                                                 | 10.0                                                 | 327                   | 875.0                                                   | 2886.7                                                 |
| Staphylococcus Nuclease (2)                | 1STN | 136              | 337.0                                                 | 1030.6                                                 | 9.3                                                  | 327                   | 769.5                                                   | 2549.1                                                 |
| CT-Acp (40)                                | 2VH7 | 98               | 290.0                                                 | 886.9                                                  | 6.1                                                  | 327                   | 573.7                                                   | 1882.9                                                 |
| ECAD2 (41)                                 | 1EDH | 106              | 376.6                                                 | 1151.7                                                 | 5.4                                                  | 327                   | 629.6                                                   | 2039.9                                                 |
| Hisactophilin (42)                         | 1HCE | 118              | 234.3                                                 | 717.2                                                  | 8.4                                                  | 326.7                 | 626.0                                                   | 2091.5                                                 |
| Cold Shock B (4)                           | 1CSP | 67               | 193.0                                                 | 590.9                                                  | 4.0                                                  | 326.6                 | 380.6                                                   | 1249.0                                                 |
| Barnase (2)                                | 1RNB | 110              | 529.7                                                 | 1623.8                                                 | 7.5                                                  | 326.2                 | 885.9                                                   | 2871.8                                                 |
| IL-1 $\beta$ (2)                           | 6I1B | 153              | 351.0                                                 | 1076.7                                                 | 8.0                                                  | 326                   | 731.0                                                   | 2406.8                                                 |
| Acyl Carrier Protein (apo) (2)             | 1ACP | 77               | 160.0                                                 | 491.2                                                  | 3.3                                                  | 325.7                 | 317.7                                                   | 1044.0                                                 |
| $\alpha$ -sarcin (43)                      |      | 150              | 569.0                                                 | 1747.5                                                 | 5.8                                                  | 325.6                 | 845.4                                                   | 2714.4                                                 |
| Rnase T1 (4)                               | 9RNT | 104              | 442.3                                                 | 1362.4                                                 | 7.1                                                  | 324.6                 | 789.9                                                   | 2575.8                                                 |
| Stefin B (2)                               | 1STF | 95               | 293.0                                                 | 906.6                                                  | 6.7                                                  | 323.2                 | 630.0                                                   | 2078.9                                                 |
| N1 CBD of CenC (44)                        |      | 152              | 391.4                                                 | 1213.6                                                 | 7.5                                                  | 322.5                 | 773.9                                                   | 2542.2                                                 |

| Protein                   | PDB  | N <sub>res</sub> | $\Delta H(T_m)$<br>( $\frac{\text{kJ}}{\text{mol}}$ ) | $\Delta S(T_m)$<br>( $\frac{\text{J}}{\text{mol K}}$ ) | $\Delta C_p$<br>( $\frac{\text{kJ}}{\text{mol K}}$ ) | T <sub>m</sub><br>(K) | $\Delta H(373.5)$<br>( $\frac{\text{kJ}}{\text{mol}}$ ) | $\Delta S(385)$<br>( $\frac{\text{J}}{\text{mol K}}$ ) |
|---------------------------|------|------------------|-------------------------------------------------------|--------------------------------------------------------|------------------------------------------------------|-----------------------|---------------------------------------------------------|--------------------------------------------------------|
| ApoCytochrome b5 (45)     |      | 90               | 149.3                                                 | 464.4                                                  | 4.2                                                  | 321.5                 | 367.7                                                   | 1221.4                                                 |
| Rnase Sa (4)              | 1RGG | 96               | 407.5                                                 | 1268.0                                                 | 6.3                                                  | 321.4                 | 734.7                                                   | 2401.8                                                 |
| ADK (Yeast) (46)          | 1AKY | 220              | 340.0                                                 | 1060.2                                                 | 8.5                                                  | 320.7                 | 788.8                                                   | 2613.4                                                 |
| Flagellin Monomer (47)    | 1UCU | 494              | 1338.9                                                | 4177.5                                                 | 25.5                                                 | 320.5                 | 2690.4                                                  | 8853.2                                                 |
| PA c551 (11)              | 451C | 82               | 157.7                                                 | 492.4                                                  | 3.0                                                  | 320.3                 | 317.3                                                   | 1044.3                                                 |
| Rnase Sa3 (4)             |      | 99               | 391.6                                                 | 1223.0                                                 | 6.7                                                  | 320.2                 | 748.2                                                   | 2456.0                                                 |
| Type III Antifreeze (48)  | 1MSI | 65               | 228.5                                                 | 714.4                                                  | 3.1                                                  | 319.8                 | 397.4                                                   | 1298.2                                                 |
| Glycoprotein (AGP) (49)   | 3BX6 | 192              | 252.0                                                 | 788.5                                                  | 8.8                                                  | 319.6                 | 726.3                                                   | 2426.8                                                 |
| CPS (28)                  |      | 84               | 283.0                                                 | 890.2                                                  | 6.3                                                  | 317.9                 | 633.3                                                   | 2096.7                                                 |
| YopM (50)                 | 1JL5 | 454              | 538.9                                                 | 1696.8                                                 | 23.0                                                 | 317.6                 | 1825.3                                                  | 6125.5                                                 |
| AdaC (6)                  | 1SFE | 178              | 284.0                                                 | 896.5                                                  | 7.4                                                  | 316.8                 | 703.6                                                   | 2339.3                                                 |
| $\alpha$ -Lactalbumin (2) | 1ALC | 122              | 276.1                                                 | 872.9                                                  | 7.6                                                  | 316.3                 | 710.8                                                   | 2366.7                                                 |
| Rnase Sa2 (4)             |      | 97               | 286.2                                                 | 911.1                                                  | 5.4                                                  | 314.1                 | 609.3                                                   | 2018.4                                                 |
| SBP (Apo) (51)            |      | 326              | 308.0                                                 | 990.4                                                  | 9.0                                                  | 311                   | 870.5                                                   | 2911.4                                                 |



| Mesophilic Species           | $\Delta H^\ddagger$ | $\Gamma$ | $T_{Opt}$ | $\bar{L}$ |
|------------------------------|---------------------|----------|-----------|-----------|
| B. Megaterium (52)           | 19.7                | 26       | 315.2     | 272       |
| B. Subtilis (52)             | 16.9                | 30       | 314.5     | 294       |
| E. Coli (53)                 | 27.1                | 51       | 314 .1    | 301       |
| L. Monocytogenes (54)        | 25.9                | 223      | 309.7     | 303       |
| P. Aeruginosa (52)           | 21.6                | 101      | 311.9     | 328       |
| P. Fluorescens (52)          | 28.9                | 166      | 311.7     | 340       |
| Thermophilic Species         | $\Delta H^\ddagger$ | $\Gamma$ | $T_{Opt}$ | $\bar{L}$ |
| B. Acidocaldarius (55)       | 15.6                | 107      | 339.2     | 306       |
| M . Thermoautotrophicus (56) | 29.8                | 81       | 341.2     | 281       |
| T. Aquaticus (52)            | 19.1                | 3        | 347       | 284       |
| T. Brockii (57)              | 48.8                | 22       | 345.3     | 304       |
| T. Neopolitana (58)          | 28.4                | 1        | 348       | 313       |
| T. Thermophilus (59)         | 10.6                | 2        | 346.9     | 299       |

Table 2: Fitted Parameters from Proteome Analysis:  $\Delta H^\ddagger$ ,  $\Gamma$ , and  $T_{Opt}$  are activation barrier, essential proteins, and optimum growth temperature, respectively, calculated from fitting equation 11 (in the manuscript) to experimental data.  $\bar{L}$  is average length of all the proteins found within a given proteome.

## References

- [1] Wallgren, M., J. Aden, O. Pylypenko, T. Mikaelsson, L. B. A. Johansson, A. Rak, and M. Wolf-Watz, 2008. Extreme temperature tolerance of a hyperthermophilic protein coupled to residual structure in the unfolded state. *Journal of Molecular Biology* 379:845–858.
- [2] Robertson, A., and K. Murphy, 1997. Protein structure and the energetics of protein stability. *Chemical Reviews* 97:1251–1267.
- [3] Deutschman, W., and F. Dahlquist, 2001. Thermodynamic basis for the increased thermostability of CheY from the hyperthermophile *Thermotoga maritima*. *Biochemistry* 40:13107–13113.
- [4] Kumar, S., C. Tsai, and R. Nussinov, 2001. Thermodynamic Difference among Homologous Thermophilic and Mesophilic Proteins. *Biochemistry* 40:14152–14165.
- [5] Carra, J., E. Murphy, and P. Privalov, 1996. Thermodynamic effects of mutations on the denaturation of T4 lysozyme. *Biophysical Journal* 71:1994–2001.
- [6] Shiraki, K., S. Nishikori, S. Fujiwara, H. Hashimoto, M. Kai, Yand Takagi, and T. Imanaka, 2001. Comparative analyses of the conformational stability of a hyperthermophilic protein and its mesophilic counterpart. *European Journal Of Biochemistry* 268:4144–4150.
- [7] Wang, T., Y. Zhu, and F. Gai, 2004. Folding of a Three-Helix Bundle at the Folding Speed Limit. *J. Phys. Chem. B.* 108:3694–3697.
- [8] Lee, C., M. Allen, M. Bycroft, and K. Wong, 2005. Electrostatic Interactions Contribute to Reduced Heat Capacity Change of Unfolding in a Thermophilic Ribosomal Protein L30e. *J. Mol. Biol.* 348:419–431.
- [9] Razvi, A., and J. Scholtz, 2006. A Thermodynamic Comparison of HPr Proteins from Extremophilic Organisms. *Biochemistry* 45:4084–4092.
- [10] Notomista, E., F. Catanzano, G. Graziano, F. Dal Piaz, G. Barone, G. D’Alessio, and A. Di Donato, 2000. Onconase: An unusually stable protein. *Biochemistry* 39:8711–8718.

- [11] Hasegawa, J., S. Uchiyama, Y. Tanimoto, M. Mizutani, Y. Kobayashi, Y. Sambongi, and Y. Igarashi, 2000. Selected mutations in a mesophilic cytochrome c confer the stability of a thermophilic counterpart. *Journal of Biological Chemistry* 275:37824–37828.
- [12] Romero, C. M., J. M. Lozano, J. Sancho, and G. I. Giraldo, 2007. Thermal stability of beta-lactoglobulin in the presence of aqueous solution of alcohols and polyols. *International Journal of Biological Macromolecules* 40:423–428.
- [13] Bae, S., and J. Sturtevant, 1995. Thermodynamics of the thermal unfolding of Eglin-C in the presence and absence of guanidinium chloride. *Biophysical Journal* 55:247–252.
- [14] Teles, R., L. Calderon, F. Medrano, J. Barbosa, B. Guimaraes, M. Santoro, and S. de Freitas, 2005. pH dependence thermal stability of a chymotrypsin inhibitor from *Schizolobium parahyba* seeds. *Biophysical Journal* 88:3509–3517.
- [15] Kelly, L., and L. Holladay, 1990. A comparative study of the unfolding thermodynamics of vertebrate metmyoglobins. *Biochemistry* 29:5062–5069.
- [16] Gray, R., and J. Trent, 2005. Contribution of a single-turn alpha-helix to the conformational stability and activity of the alkaline proteinase inhibitor of *Pseudomonas aeruginosa*. *Biochemistry* 44:2469–2477.
- [17] Gray, R., and J. Trent, 2005. Contribution of a single-turn alpha-helix to the conformational stability and activity of the alkaline proteinase inhibitor of *Pseudomonas aeruginosa*. *Biochemistry* 44:2469–2477.
- [18] Lim, W., R. Fox, and F. Richards, 1994. Stability and peptide binding-affinity of an SH3 domain from the *Caenorhabditis-Elegans* signaling protein SEM-5. *Protein Science* 3:1261–1266.
- [19] Muccio, D., D. Waterhous, F. Fish, and C. Brouillette, 1992. Analysis of the 2-state behavior of the thermal unfolding of serum retinol binding-protein containing a single retinol ligand. *Biochemistry* 31:5560–5567.

- [20] Perl, D., U. Mueller, U. Heinemann, and F. Schmid, 2000. Two exposed amino acid residues confer thermostability on a cold shock protein. *Nature Structural Biology* 7:380–383.
- [21] Shih, P., and J. Kirsch, 1995. Design and structural-analysis of an engineered thermostable chicken lysozyme. *Protein Science* 4:2063–2072.
- [22] Gushchina, L. V., A. G. Gabdulkhakov, S. V. Nikonov, P. L. Mateo, and V. V. Filimonov, 2009. Structural and thermodynamic studies of Bergerac-SH3 chimeras. *Biophysical Chemistry* 139:106–115.
- [23] Shnyrov, V., and A. Berman, 1988. Calorimetric study of thermal-denaturation of vertebrae visual pigments. *Biomedica Biochimica Acta* 47:355–362.
- [24] Chen, C.-H., L. Roth, R. MacColl, and D. Berns, 1994. Thermodynamics elucidation of the structural stability of a thermophilic protein. *Biophysical Chemistry* 50:313–321.
- [25] Zhu, Y., D. Alonso, K. Maki, C. Y. Huang, S. J. Lahr, V. Daggett, H. Roder, W. F. Degrado, and F. Gai, 2003. Ultrafast folding of alpha(3): A de novo designed three-helix bundle protein. *Proc. Natl. Acad. Sci. USA* 100(26):15486–15491.
- [26] Consalvi, V., R. Chiaraluce, L. Giangiacomo, R. Scandurra, P. Christova, A. Karshikoff, S. Knapp, and R. Ladenstein, 2000. Thermal unfolding and conformational stability of the recombinant domain II of glutamate dehydrogenase from the hyperthermophile *Thermotoga maritima*. *Protein Engineering* 13:501–507.
- [27] Burova, T., Y. Choiset, C. Jankowski, and T. Haertle, 1999. Conformational stability and binding properties of porcine odorant binding protein. *Biochemistry* 38:15043–15051.
- [28] Wenk, M., and R. Jaenicke, 1999. Calorimetric analysis of the Ca<sup>2+</sup>-binding beta gamma-crystallin homolog protein S from *Myxococcus xanthus*: Intrinsic stability and mutual stabilization of domains. *Journal of Molecular Biology* 293:117–124.
- [29] Kumar, S., C. Tsai, and R. Nussinov, 2002. Maximal stabilities of reversible two-state proteins. *Biochemistry* 41:5359–5374.

- [30] Santos, J., V. A. Risso, M. P. Sica, and M. R. Ermacora, 2007. Effects of serine-to-cysteine mutations on beta-lactamase folding. *Biophysical Journal* 93:1707–1718.
- [31] Balsera, M., M. Menendez, J. Saiz, J. de las Rivas, J. Andreu, and J. Arellano, 2004. Structural stability of the PsbQ protein of higher plant photosystem II. *Biochemistry* 43:14171–14179.
- [32] Del Vecchio, P., F. Catanzano, B. de Paola, and G. Barone, 2000. Thermodynamic stability of ribonuclease B. *Journal of Thermal Analysis and Calorimetry* 61:363–368.
- [33] Nicholson, E., and J. Scholtz, 1996. Conformational stability of the Escherichia coli HPr protein: Test of the linear extrapolation method and a thermodynamic characterization of cold denaturation. *Biochemistry* 35:11369–11378.
- [34] Ganesh, C., A. Shah, C. Swaminathan, A. Surolia, and R. Varadarajan, 1997. Thermodynamic characterization of the reversible, two-state unfolding of maltose binding protein, a large two-domain protein. *Biochemistry* 36:5020–5028.
- [35] Arunachalam, U., and J. Kellis, 1996. Folding and stability of endoglucanase III, a single-domain cellulase from *Trichoderma reesei*. *Biochemistry* 35:11379–11385.
- [36] Ginsburg, A., R. Szczepanowski, S. Ruvinov, N. Nosworthy, M. Sondej, T. Umland, and A. Peterkofsky, 2000. Conformational stability changes of the amino terminal domain of enzyme I of the Escherichia coli phosphoenolpyruvate : sugar phosphotransferase system produced by substituting alanine or glutamate for the active-site histidine 189: Implications for phosphorylation effects. *Protein Science* 9:1085–1094.
- [37] Kodicek, M., A. Infanzon, and V. Karpenko, 1995. Heat denaturation of Human orosomucoid in water-methanol mixtures. *Biochimica et Biophysica Acta-Protein Structure and Molecular Enzymology* 1246:10–16.
- [38] Bunagan, M., X. Yang, J. Saven, and F. Gai, 2006. Ultrafast folding of a computationally designed Trp-cage mutant: Trp(2)-cage. *Journal of Physical Chemistry B* 110:3759–3763.

- [39] Tall, A., G. Shipley, and D. Small, 1976. Conformational and thermodynamic properties of Apo A-1 of Human-Plasma high-density lipoproteins. *Journal of Biological Chemistry* 251:3749–3755.
- [40] Taddei, N., F. Chiti, P. Paoli, T. Fiaschi, M. Bucciantini, M. Stefani, C. Dobson, and G. Ramponi, 1999. Thermodynamics and kinetics of folding of common-type acylphosphatase: Comparison to the highly homologous muscle isoenzyme. *Biochemistry* 38:2135–2142.
- [41] Prasad, A., N. Housley, and S. Pedigo, 2004. Thermodynamic stability of Domain 2 of epithelial cadherin. *Biochemistry* 43:8055–8066.
- [42] Liu, C., D. Chu, R. Wideman, R. Houliston, H. Wong, and E. Meiering, 2001. Thermodynamics of denaturation of hisactophilin, a beta-trefoil protein. *Biochemistry* 40:3817–3827.
- [43] Gasset, M., J. Mancheno, J. Laynez, J. Lacadena, G. Fernandezballester, A. Del Pozo, M. Onaderra, and J. Gavilanes, 1995. Thermal unfolding of the Cytotoxin Alpha-Sarcin - Phospholipid-binding induces destabilization of the protein-structure. *Biochimica et Biophysica Acta-Protein Structure and Molecular Enzymology* 1252:126–134.
- [44] Creagh, A., J. Koska, P. Johnson, P. Tomme, M. Joshi, L. McIntosh, D. Kilburn, and C. Haynes, 1998. Stability and oligosaccharide binding of the N1 cellulose-binding domain of *Cellulomonas fimi* endoglucanase CenC. *Biochemistry* 37:3529–3537.
- [45] Pfeil, W., 1993. Thermodynamics of Apocytochrome-B(5) Unfolding. *Protein Science* 2:1497–1501.
- [46] Spuergin, P., U. Abele, and G. Schulz, 1995. Stability, activity, and structure of Adenylate Kinase mutants. *European Journal of Biochemistry* 231:405–413.
- [47] Fedorov, O., N. Khechinashvili, K. R., and S. Asakura, 1984. Multidomain of Flagellin. *Journal of Molecular Biology* 175:83–87.
- [48] Garcia-Arribas, O., R. Mateo, M. M. Tomczak, P. L. Davies, and M. G. Mateu, 2007. Thermodynamic stability of a cold-adapted protein, type III antifreeze protein, and energetic contribution of salt bridges. *Protein Science* 16:227–238.

- [49] Rojodominguez, A., R. Zubillagaluna, and A. Hernandezarana, 1990. Unfolding Behavior of human alpha-1-acid glycoprotein is compatible with a loosely folded region in its peptide chain. *Biochemistry* 29:8689–8695.
- [50] Kloss, E., and D. Barrick, 2008. Thermodynamics, kinetics, and salt dependence of folding of YopM, a large Leucine-rich repeat protein. *Journal of Molecular Biology* 383:1195–1209.
- [51] Kamal, J., M. Nazeerunnisa, and D. Behere, 2002. Thermal unfolding of soybean peroxidase - Appropriate high denaturant concentrations induce cooperativity allowing the correct measurement of thermodynamic parameters. *Journal of Biological Chemistry* 277:40717–40721.
- [52] Mohr, P., and S. Krawiec, 1980. Temperature characteristics and arrhenius plots for nominal psychrophiles, mesophiles and thermophiles. *Journal of General Microbiology* 121:311–317.
- [53] Salter, M., T. Ross, and T. McMeekin, 1998. Applicability of a model for non-pathogenic *Escherichia coli* for predicting the growth of pathogenic *Escherichia coli*. *Journal of Applied Microbiology* 85:357–364.
- [54] Nichols, D., K. Presser, J. Olley, T. Ross, and T. McMeekin, 2002. Variation of branched-chain fatty acids marks the normal physiological range for growth in *Listeria monocytogenes*. *Applied and Environmental Microbiology* 68:2809–2813.
- [55] Darland, G., and T. Brock, 1971. *Bacillus-acidocaldarius* sp.nov., an acidophilic thermophilic spore-forming bacterium. *Journal of General Microbiology* 67:9–15.
- [56] Zeikus, J., and R. Wolfe, 1972. *Methanobacterium-Thermoautotrophicus* Sp N, An Anaerobic, Autotrophic, Extreme Thermophile. *Journal of Bacteriology* 109:707–&.
- [57] Zeikus, J., P. Hegge, and M. Anderson, 1979. *Thermoanaerobium-Brockii* Gen-Nov and Sp-Nov, a new Chemoorganotrophic, Caldoactive, Anaerobic Bacterium. *Archives of Microbiology* 122:41–48.

- [58] Belkin, S., C. Wirsen, and H. Jannasch, 1986. A new sulfur-reducing, extremely thermophilic eubacterium from a submarine thermal vent. *Applied and Environmental Microbiology* 51:1180–1185.
- [59] Oshima, T., and K. Imahori, 1974. Description of *Thermus-Thermophilus* (Yoshida and Oshima) Comb-Nov, a nonsporulating thermophilic bacterium from a Japanese thermal spa. *International Journal of Systematic Bacteriology* 24:102–112.
